# Supplementary material for: Influence of Genistein on Hepatic Lipid Metabolism in an In Vitro Model of Hepatic Steatosis
Source: MDPI journal article supplement (doi:10.3390/molecules26041156), 2021-02-22
Supplement: s1 [file s1]

*Supplementary Materials*

# Influence of Genistein on the Hepatic Lipid Metabolism in an In Vitro Model of Hepatic Steatosis

Lena Seidemann <sup>1,2</sup>, Anne Krüger <sup>3</sup>, Victoria Kegel-Hübner <sup>1</sup>, Daniel Seehofer <sup>1,3</sup> and Georg Damm <sup>1,2,3,\*</sup>

<sup>1</sup> Department of Hepatobiliary Surgery and Visceral Transplantation, University Hospital, Leipzig University, 04103 Leipzig, Germany; lena.seidemann@medizin.uni-leipzig.de (L.S.); victoria.kegel@yahoo.de (V.K.-H.); daniel.seehofer@medizin.uni-leipzig.de (D.S.)

<sup>2</sup> Saxonian Incubator for Clinical Translation (SIKT), Leipzig University, 04103 Leipzig, Germany

<sup>3</sup> Department of General, Visceral- and Transplantation Surgery, Charité University Medicine Berlin, 13353 Berlin, Germany; kruegera@uni-greifswald.de. (A.K.)

\* Correspondence: georg.damm@medizin.uni-leipzig.de; Tel.: +49-341-9739656 (G.D.)

## Supplementary Figures

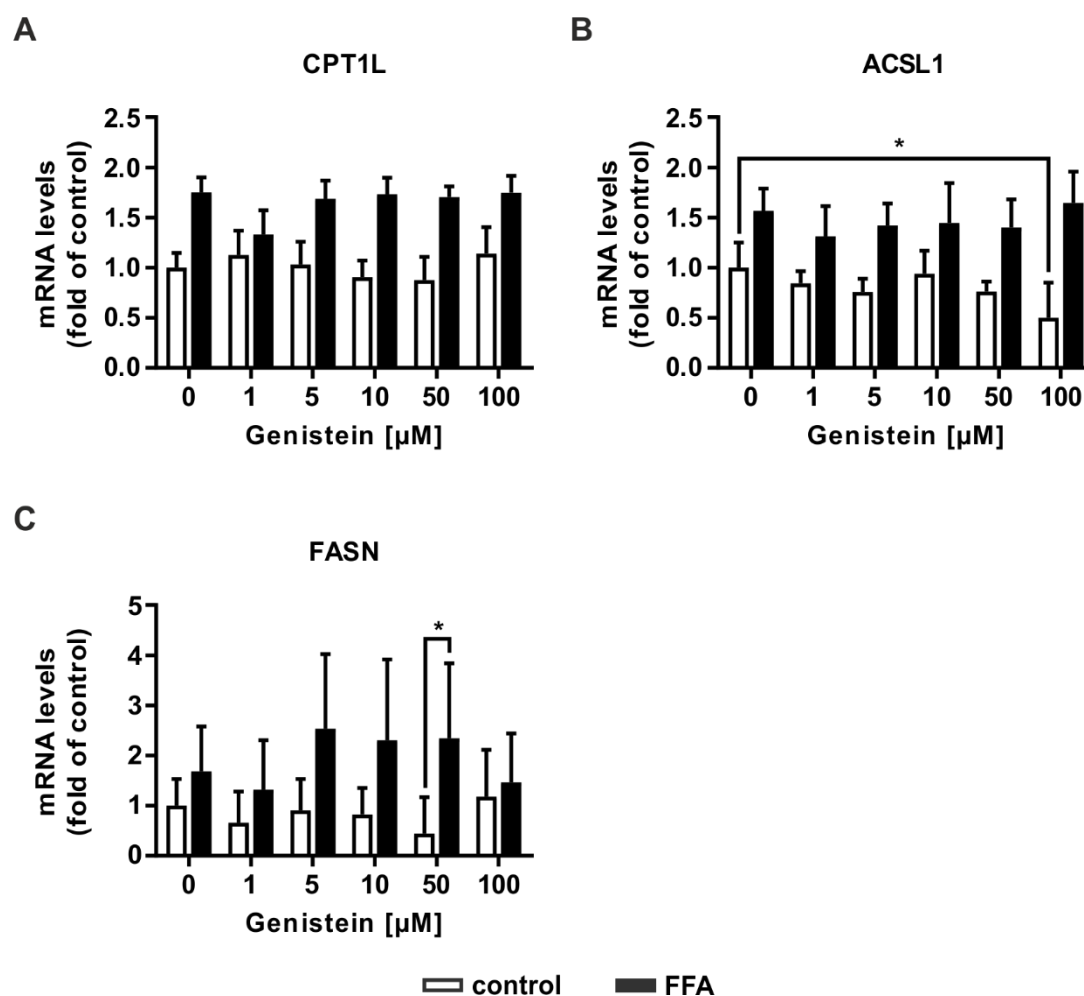

**Figure S1.** Evaluation of the effect of genistein on the transcriptional targets of PPAR $\alpha$  and SREBP-1c in steatotic PHHs. PHHs were treated with 1 mM FFA for 24 h, followed by 24 h of additive treatment with genistein (0, 1, 5, 10, 50, 100  $\mu$ M). Relative expression levels of (A) CPT1L, (B) ACSL1 and (C) FASN mRNA were determined by RT-qPCR. Data are shown as mean + SD, n = 5, two-way ANOVA with Tukey or Sidak post hoc test.  $p \leq 0.05$  (\*). Selected comparisons are shown; for details on the statistical evaluation, see Table S1C.
