# Supplementary material for: Influence of Genistein on Hepatic Lipid Metabolism in an In Vitro Model of Hepatic Steatosis
Source: Molecules. 2021 Feb 22;26(4):1156. doi: 10.3390/molecules26041156 (PMC7926972; doi:10.3390/molecules26041156)
Supplement: Supplementary file 1 [file molecules-26-01156-s001.zip › Supplementary Table S1.xlsx]

## Sheet: Figure 5 Cytotoxicity of Gen.
	Supplementary Table S1. Statistical analysis was performed with two-way ANOVA for the main factors genistein and steatosis followed by a Tukey or Sidak post hoc analysis. A p value of 0.05 or less was considered significant (black values).
	(A) Statistical analysis for Figure 5A-B of cytotoxic effects of genistein.
	source of variation (two-way ANOVA)			p value
				XTT	LDH
	genistein			0.0002	0.249
	steatosis			0.1467	0.0334
	interaction: genistein x steatosis			0.652	0.6822
	comparison			adjusted p value
				XTT	LDH
	genistein (Tukey's multiple comparisons test)	control	0 vs. 1	0.9999	0.3962
			0 vs. 5	>0,9999	>0,9999
			0 vs. 10	0.9801	0.1879
			0 vs. 50	0.6047	0.9916
			0 vs. 100	0.0131	0.2194
			1 vs. 5	>0,9999	0.3771
			1 vs. 10	0.9346	0.9912
			1 vs. 50	0.4791	0.6963
			1 vs. 100	0.0093	0.9968
			5 vs. 10	0.9629	0.1772
			5 vs. 50	0.5444	0.9885
			5 vs. 100	0.0112	0.2072
			10 vs. 50	0.9272	0.3934
			10 vs. 100	0.0365	>0,9999
			50 vs. 100	0.1498	0.4476
		FFA	0 vs. 1	0.9995	0.1791
			0 vs. 5	0.9991	>0,9999
			0 vs. 10	0.8797	0.8465
			0 vs. 50	0.8456	0.7943
			0 vs. 100	0.007	0.4324
			1 vs. 5	0.9836	0.2013
			1 vs. 10	0.9662	0.6947
			1 vs. 50	0.692	0.755
			1 vs. 100	0.0045	0.9809
			5 vs. 10	0.7135	0.8805
			5 vs. 50	0.9586	0.8334
			5 vs. 100	0.0116	0.4745
			10 vs. 50	0.301	>0,9999
			10 vs. 100	0.0016	0.9642
			50 vs. 100	0.0393	0.9813
	steatosis (Sidak's multiple comparisons test)		0	0.5338	0.0615
		control vs. FFA	1	0.5793	0.0229
			5	0.2933	0.0501
			10	>0,9999	0.5271
			50	0.811	0.0192
			100	0.3045	0.1467

## Sheet: Figure 6 Gen_PPARa+SREBP-1c
	Supplementary Table S1. Statistical analysis was performed with two-way ANOVA for the main factors genistein and steatosis followed by a Tukey or Sidak post hoc analysis. A p value of 0.05 or less was considered significant (black values).
	(B) Statistical analysis for Figure 6Ai-Biii of genistein's effects on PPARα and SREBP-1c.
	source of variation (two-way ANOVA)			p value
				PPARα mRNA	Cytosolic PPARα	Nuclear PPARα	SREBP-1c mRNA	Membrane-st. SREBP-1c	Nuclear SREBP-1c
	genistein			0.0461	0.0043	0.0006	0.1542	0.4211	0.0156
	steatosis			0.0081	0.0965	0.3551	0.2052	0.4402	0.1904
	interaction: genistein x steatosis			0.0138	0.0835	0.1376	0.0874	0.2051	0.7651
	comparison			adjusted p value
				PPARα mRNA	Cytosolic PPARα	Nuclear PPARα	SREBP-1c mRNA	Membrane-st. SREBP-1c	Nuclear SREBP-1c
	genistein (Tukey's multiple comparisons test)	control	0 vs. 1	0.986	0.9718	0.9899	0.759	0.9878	0.9933
			0 vs. 5	>0,9999	0.8934	0.5277	0.5911	0.6864	0.4323
			0 vs. 10	0.9766	0.0188	0.1658	0.644	0.6555	0.402
			0 vs. 50	0.0032	0.0142	0.0354	0.0591	0.4917	0.1189
			0 vs. 100	0.1929	0.0362	0.012	0.8554	0.8544	0.2358
			1 vs. 5	0.986	0.9996	0.854	0.9997	0.9524	0.7438
			1 vs. 10	>0,9999	0.0764	0.3998	>0,9999	0.9394	0.7117
			1 vs. 50	0.0134	0.0582	0.1043	0.536	0.8373	0.2837
			1 vs. 100	0.4958	0.1393	0.0372	>0,9999	0.9941	0.4922
			5 vs. 10	0.9766	0.129	0.9579	>0,9999	>0,9999	>0,9999
			5 vs. 50	0.0032	0.0996	0.5557	0.7075	0.9993	0.952
			5 vs. 100	0.1928	0.2262	0.2686	0.9964	0.9994	0.9976
			10 vs. 50	0.0159	>0,9999	0.9488	0.6559	0.9997	0.9639
			10 vs. 100	0.5434	0.9992	0.7077	0.9986	0.9988	0.9988
			50 vs. 100	0.3882	0.9957	0.9918	0.4234	0.9841	0.998
		FFA	0 vs. 1	>0,9999	0.9892	>0,9999	0.9867	0.9736	>0,9999
			0 vs. 5	>0,9999	0.2483	0.9965	0.294	0.808	0.2091
			0 vs. 10	0.9966	0.5007	>0,9999	0.7946	0.9067	0.0247
			0 vs. 50	0.9873	0.8279	0.9781	0.9995	0.9994	0.1041
			0 vs. 100	0.9998	0.8194	>0,9999	0.0732	0.6172	0.2508
			1 vs. 5	0.9978	0.5461	0.9988	0.6481	0.9951	0.2857
			1 vs. 10	0.9797	0.8367	>0,9999	0.9865	0.9997	0.0363
			1 vs. 50	0.9522	0.9892	0.9626	0.9995	0.8894	0.148
			1 vs. 100	0.9965	0.9877	0.9999	0.2331	0.2423	0.3377
			5 vs. 10	0.9998	0.9943	0.9914	0.9433	0.9999	0.8291
			5 vs. 50	0.998	0.871	0.8395	0.459	0.6299	0.998
			5 vs. 100	>0,9999	0.8781	0.9886	0.9672	0.1053	>0,9999
			10 vs. 50	>0,9999	0.9907	0.9889	0.9268	0.763	0.9661
			10 vs. 100	>0,9999	0.9919	>0,9999	0.5603	0.1569	0.7701
			50 vs. 100	0.9988	>0,9999	0.9916	0.1348	0.7973	0.9937
	steatosis (Sidak's multiple comparisons test)		0	0.7222	0.0888	0.022	0.7065	>0,9999	0.0067
		control vs. FFA	1	0.4415	0.1179	0.0873	0.9865	0.6212	0.0034
			5	0.5824	0.007	0.8101	0.3521	0.067	0.0189
			10	0.1098	0.9757	0.9241	0.8617	0.0953	0.1775
			50	<0,0001	>0,9999	0.9827	0.7109	0.5386	0.0078
			100	0.0039	0.996	0.9988	0.028	0.9999	0.0061

## Sheet: Figure S1 Gen_CPT1L+ASCL1+FASN
	Supplementary Table S1. Statistical analysis was performed with two-way ANOVA for the main factors genistein and steatosis followed by a Tukey or Sidak post hoc analysis. A p value of 0.05 or less was considered significant (black values).
	(C) Statistical analysis for Figure S1A-C of genistein's effects on CPT1L, ACSL1 and FASN.
	source of variation (two-way ANOVA)			p value
				CPT1L	ACSL1	FASN
	genistein			0.8891	0.5549	0.5792
	steatosis			0.001	0.0441	0.4276
	interaction: genistein x steatosis			0.3232	0.1143	0.5625
	comparison			adjusted p value
				CPT1L	ACSL1	FASN
	genistein (Tukey's multiple comparisons test)	control	0 vs. 1	0.9756	0.9567	0.9725
			0 vs. 5	>0,9999	0.7519	>0,9999
			0 vs. 10	0.9887	0.9996	0.9993
			0 vs. 50	0.9633	0.7599	0.6968
			0 vs. 100	0.9661	0.0282	0.9997
			1 vs. 5	0.994	0.9948	0.9915
			1 vs. 10	0.7577	0.9942	0.9983
			1 vs. 50	0.6466	0.9955	0.9798
			1 vs. 100	>0,9999	0.1483	0.8966
			5 vs. 10	0.9622	0.8957	>0,9999
			5 vs. 50	0.912	>0,9999	0.7942
			5 vs. 100	0.9904	0.3446	0.9967
			10 vs. 50	>0,9999	0.901	0.8728
			10 vs. 100	0.7248	0.0534	0.9865
			50 vs. 100	0.6111	0.3374	0.5199
		FFA	0 vs. 1	0.5737	0.9484	0.9979
			0 vs. 5	>0,9999	0.9959	0.976
			0 vs. 10	>0,9999	0.9986	0.9926
			0 vs. 50	>0,9999	0.9932	0.9906
			0 vs. 100	>0,9999	0.9999	0.9998
			1 vs. 5	0.7094	0.9988	0.8513
			1 vs. 10	0.6116	0.9964	0.9166
			1 vs. 50	0.6744	0.9994	0.9065
			1 vs. 100	0.5809	0.8702	>0,9999
			5 vs. 10	>0,9999	>0,9999	>0,9999
			5 vs. 50	>0,9999	>0,9999	>0,9999
			5 vs. 100	>0,9999	0.9755	0.9201
			10 vs. 50	>0,9999	>0,9999	>0,9999
			10 vs. 100	>0,9999	0.987	0.9629
			50 vs. 100	>0,9999	0.9663	0.9567
	steatosis (Sidak's multiple comparisons test)		0	0.017	0.2086	0.9346
		control vs. FFA	1	0.9049	0.2232	0.7849
			5	0.0441	0.0348	0.4019
			10	0.0048	0.2447	0.4023
			50	0.0039	0.0408	0.0448
			100	0.0993	<0,0001	0.9993
